# Supplementary material
Source: PubMed Central journal article supplement (PMC4440792)
Supplement: NIHMS601995-supplement-Supplemental_file.pdf [file NIHMS601995-supplement-Supplemental_file.pdf]

## Supporting Information

© Copyright Wiley-VCH Verlag GmbH & Co. KGaA, 69451 Weinheim, 2014

### **Improved Bioactivity of Antimicrobial Peptides by Addition of Amino-Terminal Copper and Nickel (ATCUN) Binding Motifs**

M. Daben Libardo,<sup>[a]</sup> Jorge L. Cervantes,<sup>[b]</sup> Juan C. Salazar,<sup>[b]</sup> and Alfredo M. Angeles-Boza<sup>\*[a]</sup>

cmdc\_201402033\_sm\_miscellaneous\_information.pdf

cmdc\_201402033\_sm\_movie.avi

| <b><u>Table of contents</u></b>                                                                                               | <b>Page #</b> |
|-------------------------------------------------------------------------------------------------------------------------------|---------------|
| <b>Figure S1.</b> Rates of ascorbic acid consumption in the (A) presence and (B) absence of the H <sub>2</sub> O <sub>2</sub> | S-3           |
| <b>Table S1.</b> Minimum Inhibitory Concentration of ATCUN-AMPs with and without the addition of 32 μM Cu <sup>2+</sup> .     | S-4           |
| <b>Table S2.</b> Summary of characterization data for synthetic tripeptides.                                                  | S-5           |
| <b>Table S3.</b> Summary of characterization data of ATCUN-AMPs.                                                              | S-6           |

## EXPERIMENTAL DETAILS

(A)

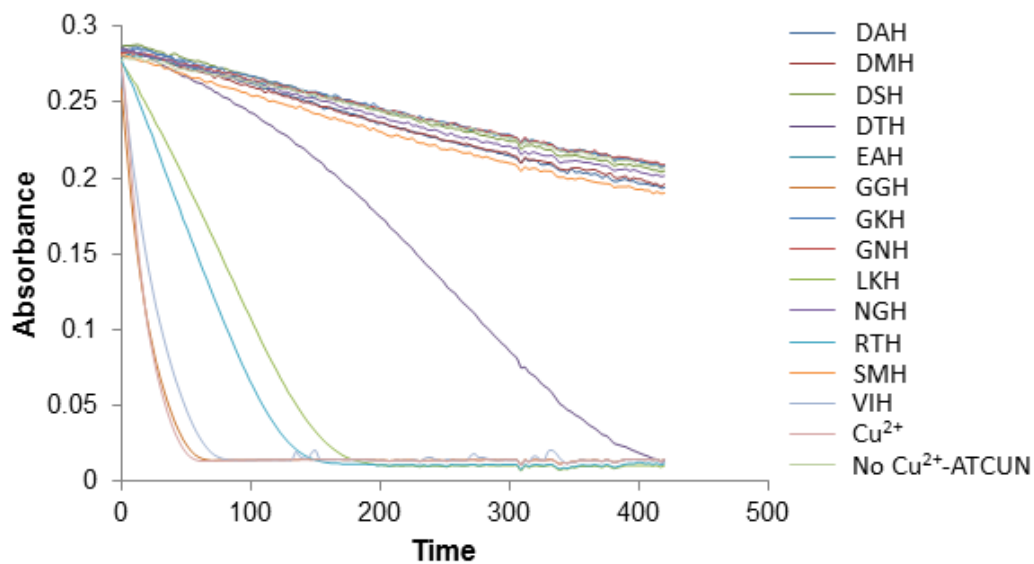

(B)

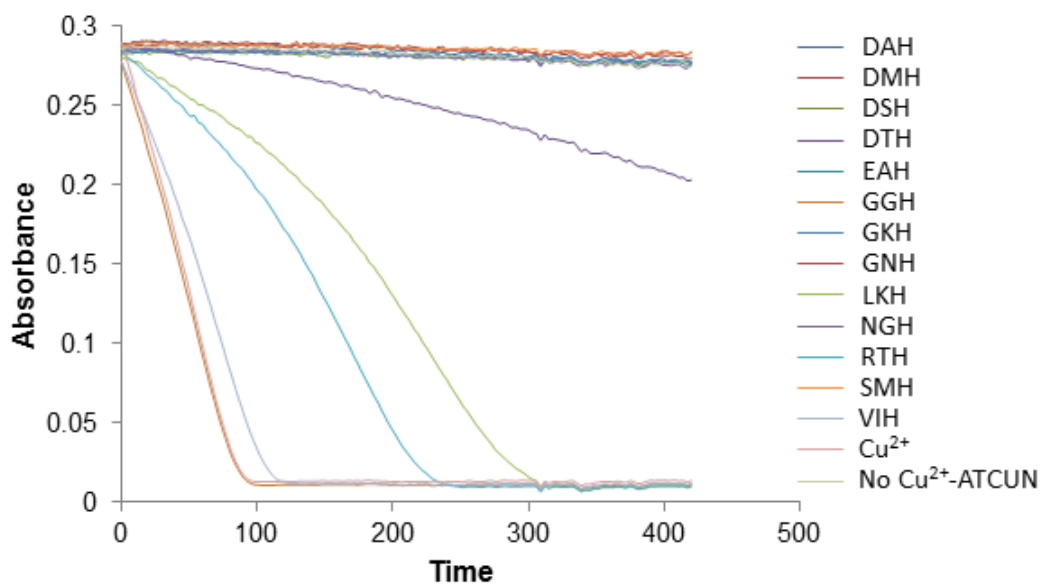

**Figure S1.** Rates of ascorbic acid consumption in the (A) presence and (B) absence of the H<sub>2</sub>O<sub>2</sub>. Reduced ascorbic acid reacts with reactive oxygen species generated by the Cu<sup>II</sup>-ATCUN complexes.

**Table S1.** Minimum Inhibitory Concentration of ATCUN-AMPs with and without the addition of 32  $\mu\text{M}$   $\text{Cu}^{2+}$ .

| Peptide                | <i>B. subtilis</i>   |                                      | <i>E. coli</i>       |                                      |
|------------------------|----------------------|--------------------------------------|----------------------|--------------------------------------|
|                        | w/o $\text{Cu}^{2+}$ | w/ 32 $\mu\text{M}$ $\text{Cu}^{2+}$ | w/o $\text{Cu}^{2+}$ | w/ 32 $\mu\text{M}$ $\text{Cu}^{2+}$ |
| Anoplin                | 4                    | 4                                    | 16                   | 16                                   |
| DAH-Anoplin            | 2                    | 2                                    | 8                    | 8                                    |
| GGH-Anoplin            | 2                    | 2                                    | 4                    | 4                                    |
| VIH-Anoplin            | 0.5                  | 0.5                                  | 2                    | 2                                    |
| PAP                    | 0.5                  | 0.25                                 | 1                    | 1                                    |
| DAH-PAP                | 0.25                 | 0.5                                  | 0.25                 | 0.25                                 |
| GGH-PAP                | 0.125                | 0.06                                 | 0.125                | 0.06                                 |
| VIH-PAP                | 0.125                | 0.03                                 | 0.25                 | 0.125                                |
| <i>sh</i> -Buforin     | 8                    | 8                                    | 32                   | 16                                   |
| <i>sh</i> -DAH-Buforin | 2                    | 2                                    | 16                   | 16                                   |
| <i>sh</i> -GGH-Buforin | 4                    | 4                                    | 16                   | 8                                    |
| <i>sh</i> -VIH-Buforin | 2                    | 1                                    | 8                    | 4                                    |

**Table S2.** Summary of characterization data for synthetic tripeptides. Purity was established by reinjecting purified peptides on a C<sub>18</sub> analytical column using 0.1% TFA in H<sub>2</sub>O (Buffer A) and 0.1% TFA in ACN (Buffer B) with a linear gradient of 0-95% Buffer B over 25 mins. Identities were confirmed using ESI-MS.

| Tripeptide          | Retention Time (mins) | % Purity | Molecular Weight | Observed [M+H] <sup>+</sup> |
|---------------------|-----------------------|----------|------------------|-----------------------------|
| DAH-NH <sub>2</sub> | 6.124                 | 98.05    | 340.68           | 341.1                       |
| DMH-NH <sub>2</sub> | 6.090                 | 96.93    | 400.46           | 401.1                       |
| DSH-NH <sub>2</sub> | 5.917                 | 95.28    | 356.34           | 357.1                       |
| DTH-NH <sub>2</sub> | 6.123                 | 96.94    | 370.37           | 371.1                       |
| EAH-NH <sub>2</sub> | 5.975                 | 97.82    | 354.34           | 355.1                       |
| GGH-NH <sub>2</sub> | 6.090                 | 98.05    | 268.27           | 269.1                       |
| GKH-NH <sub>2</sub> | 6.029                 | 96.89    | 339.30           | 340.2                       |
| GNH-NH <sub>2</sub> | 5.935                 | 95.29    | 325.32           | 326.1                       |
| LKH-NH <sub>2</sub> | 6.579                 | 98.11    | 395.50           | 396.2                       |
| NGH-NH <sub>2</sub> | 5.931                 | 97.87    | 325.32           | 326.1                       |
| RTH-NH <sub>2</sub> | 6.065                 | 98.36    | 411.47           | 412.2                       |
| SMH-NH <sub>2</sub> | 6.091                 | 96.29    | 372.45           | 373.1                       |
| VIH-NH <sub>2</sub> | 6.069                 | 97.72    | 366.46           | 367.2                       |

**Table S3.** Summary of characterization data of ATCUN-AMPs. Purity was established by reinjecting purified peptides on a C<sub>18</sub> analytical column using 0.1% TFA in H<sub>2</sub>O (Buffer A) and 0.1% TFA in ACN (Buffer B) with a linear gradient of 30-60% Buffer B over 30 mins. Identities were confirmed by ESI-MS. MS ion peaks in normal type are calculated whereas the ones in bold type are observed.

| Peptide           | Retention Time (mins) | % Purity | Molecular Weight | [M+2H] <sup>+</sup>      | [M+3H] <sup>+</sup>    | [M+4H] <sup>+</sup>    |
|-------------------|-----------------------|----------|------------------|--------------------------|------------------------|------------------------|
| Anoplin           | 14.38                 | 96.34    | 1153.51          | 577.75<br><b>577.8</b>   | -                      | -                      |
| DAH-Anoplin       | 12.85                 | 98.93    | 1476.82          | 739.41<br><b>739.0</b>   | -                      | -                      |
| GGH-Anoplin       | 12.81                 | 97.56    | 1404.75          | 703.37<br><b>703.1</b>   | -                      | -                      |
| VIH-Anoplin       | 14.14                 | 98.97    | 1502.94          | 752.47<br><b>752.0</b>   | -                      | -                      |
| Buforin II        | 11.25                 | 98.34    | 2433.87          | -                        | 812.29<br><b>812.2</b> | 609.47<br><b>609.6</b> |
| DAH-Buforin II    | 11.12                 | 98.38    | 2757.18          | -                        | 920.06<br><b>919.9</b> | 690.29<br><b>690.4</b> |
| GGH-Buforin II    | 11.18                 | 98.52    | 2685.12          | -                        | 896.04<br><b>896.0</b> | 672.28<br><b>672.3</b> |
| VIH-Buforin II    | 11.27                 | 99.47    | 2783.3           | -                        | 928.76<br><b>928.7</b> | 696.82<br><b>696.9</b> |
| sh-Buforin II     | 11.41                 | 99.33    | 2002.43          | 1002.21<br><b>1002.1</b> | 668.47<br><b>668.4</b> | -                      |
| DAH-sh-Buforin II | 11.32                 | 98.64    | 2325.73          | 1163.86<br><b>1163.5</b> | 776.24<br><b>775.9</b> | -                      |
| GGH-sh-Buforin II | 11.31                 | 99.36    | 2253.67          | 1127.83<br><b>1127.7</b> | 752.22<br><b>751.8</b> | -                      |
| VIH-sh-           | 11.36                 | 98.39    | 2351.86          | 1176.93                  | 784.95                 | -                      |

|                 |       |       |         |                          |                        |   |
|-----------------|-------|-------|---------|--------------------------|------------------------|---|
| Buforin II      |       |       |         | <b>1177.0</b>            | <b>784.7</b>           |   |
| Indolicidin     | 16.06 | 99.51 | 1906.29 | 954.14<br><b>953.6</b>   | 636.43<br><b>636.3</b> | - |
| DAH-Indolicidin | 15.34 | 99.67 | 2229.6  | 1115.8<br><b>1115.0</b>  | 744.2<br><b>744.4</b>  | - |
| GGH-Indolicidin | 14.35 | 98.52 | 2157.54 | 1079.77<br><b>1079.7</b> | 720.18<br><b>719.9</b> | - |
| VIH-Indolicidin | 16.38 | 98.60 | 2255.72 | 1128.86<br><b>1128.1</b> | 752.91<br><b>752.7</b> | - |
| PAP             | 11.25 | 97.97 | 1523.01 | 762.50<br><b>762.2</b>   | 508.67<br><b>508.7</b> | - |
| DAH-PAP         | 11.63 | 98.30 | 1846.32 | 924.16<br><b>924.4</b>   | 616.44<br><b>616.4</b> | - |
| GGH-PAP         | 11.48 | 98.05 | 1774.25 | 888.12<br><b>887.7</b>   | 592.42<br><b>592.4</b> | - |
| VIH-PAP         | 11.72 | 97.69 | 1872.44 | 937.22<br><b>936.9</b>   | 625.15<br><b>625.1</b> | - |
| Tritrpticin     | 14.89 | 99.34 | 1901.28 | 951.64<br><b>951.1</b>   | 634.76<br><b>634.7</b> | - |
| DAH-Tritrpticin | 14.59 | 99.23 | 2224.59 | 1113.291<br><b>113.9</b> | 742.53<br><b>742.3</b> | - |
| GGH-Tritrpticin | 14.52 | 98.35 | 2152.52 | 1077.26<br><b>1078.1</b> | 718.51<br><b>718.3</b> | - |
| VIH-Tritrpticin | 15.09 | 99.26 | 2250.71 | 1126.35<br><b>1126.6</b> | 751.23<br><b>750.9</b> | - |
